# Supplementary material
Source: PubMed Central journal article supplement (PMC6328294)

# Supplementary Figure 1 - Gating Schematics for FACS Data

Growth Curve Analysis (Fig. 1b and Extended Data Fig. 1d) - Refer to Materials and Methods for Experimental Design

## Gating for Live Single Cells

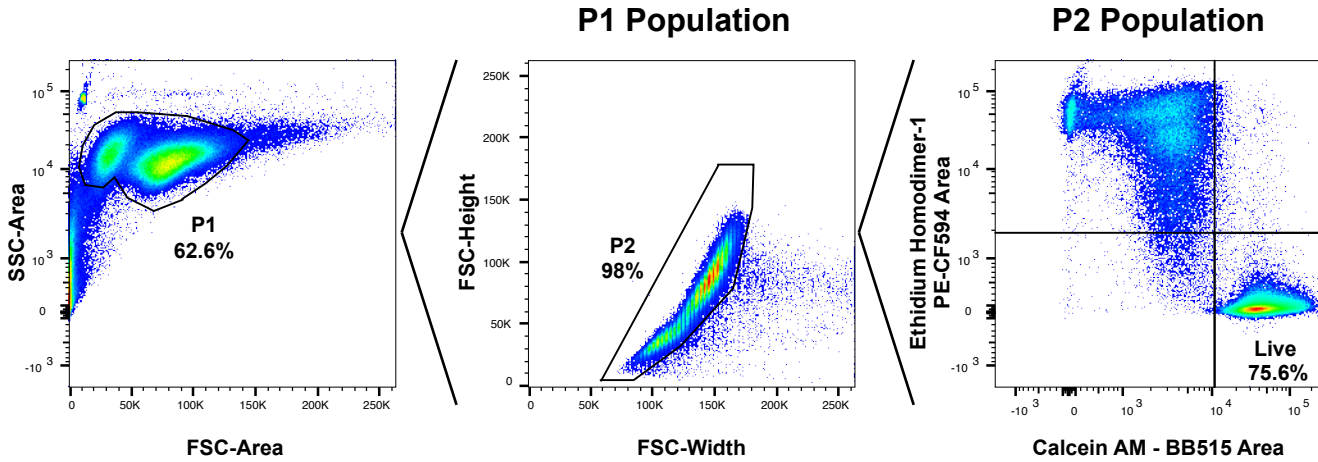

## Gating for CountBright Absolute Counting Beads

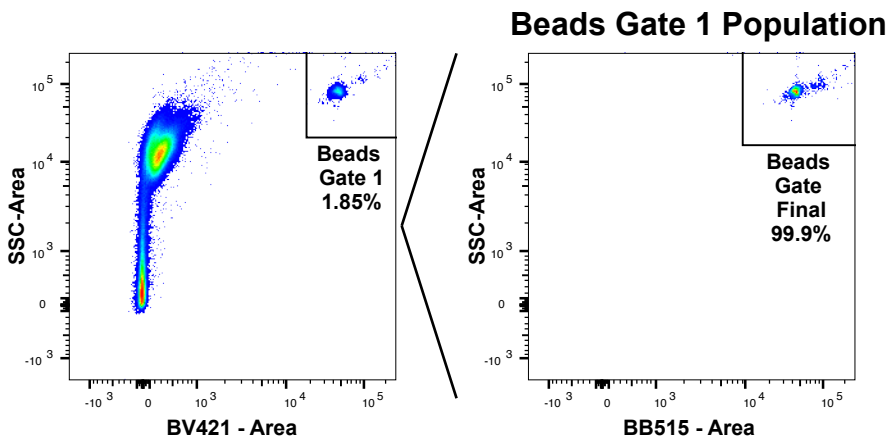

Cell Cycle Analysis (Fig. 1c and Extended Data Fig. 1e) - Refer to Materials and Methods for Experimental Design

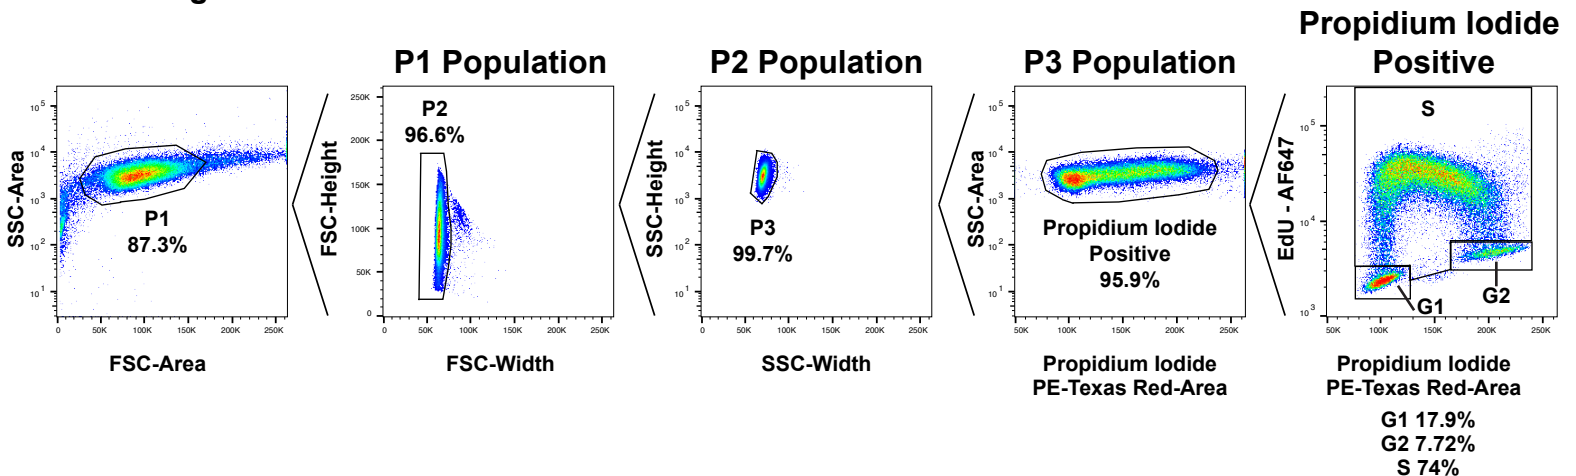

**Apoptosis Analysis (Fig. 1d and Extended Data Fig. 1f) - Refer to Materials and Methods for Experimental Design**

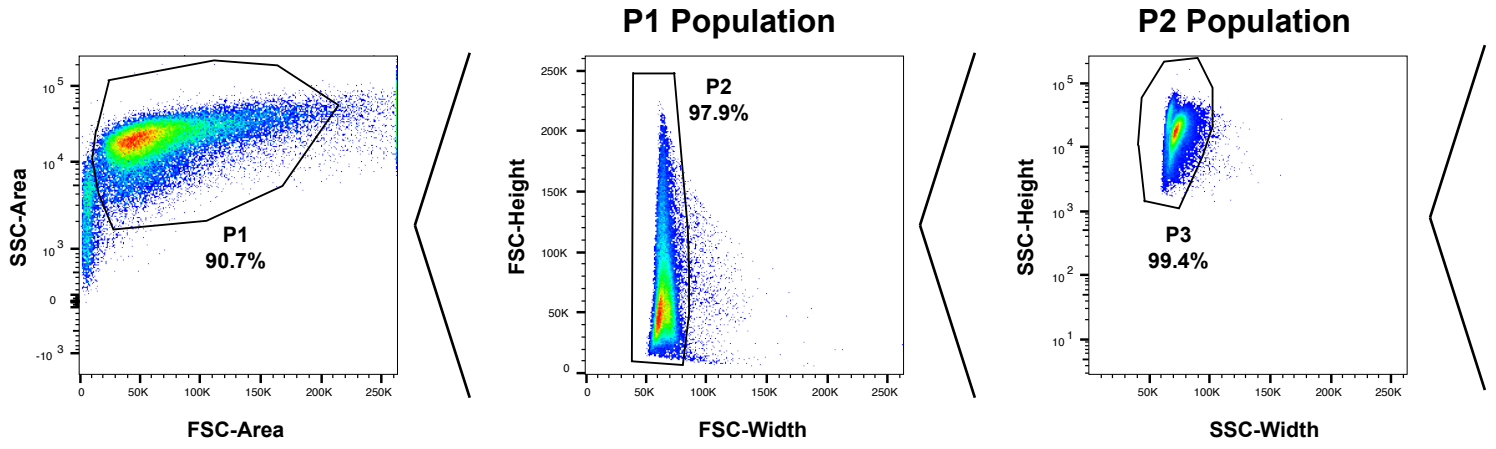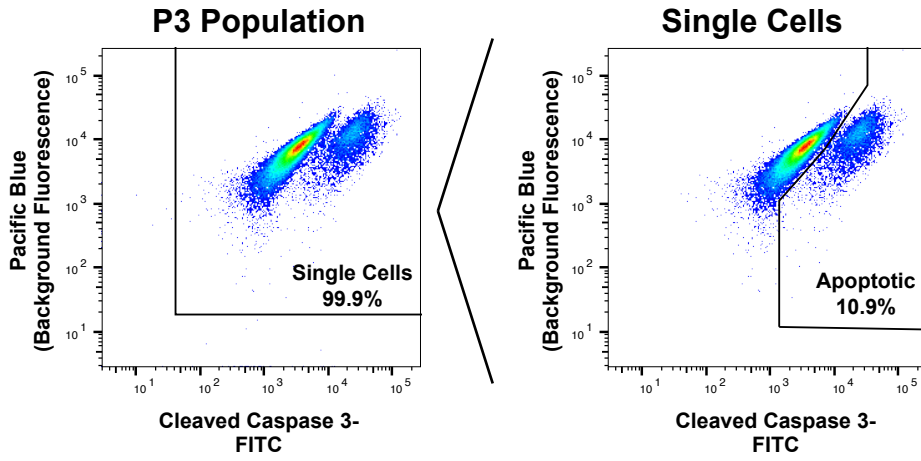

# Supplementary Figure 2 - Uncropped Western Blots

Fig. 1a:

Exposure used for Enolase

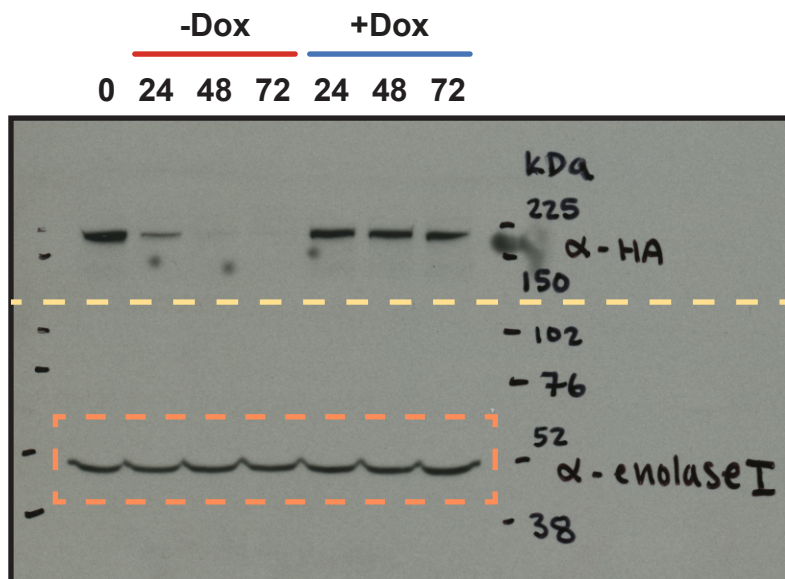

Hours

Anti-HA High Affinity Antibody (Roche 11867423001)

Approximate location membrane was cut.

Enolase I (CST 3810S)

Exposure used for HA-Cdk12

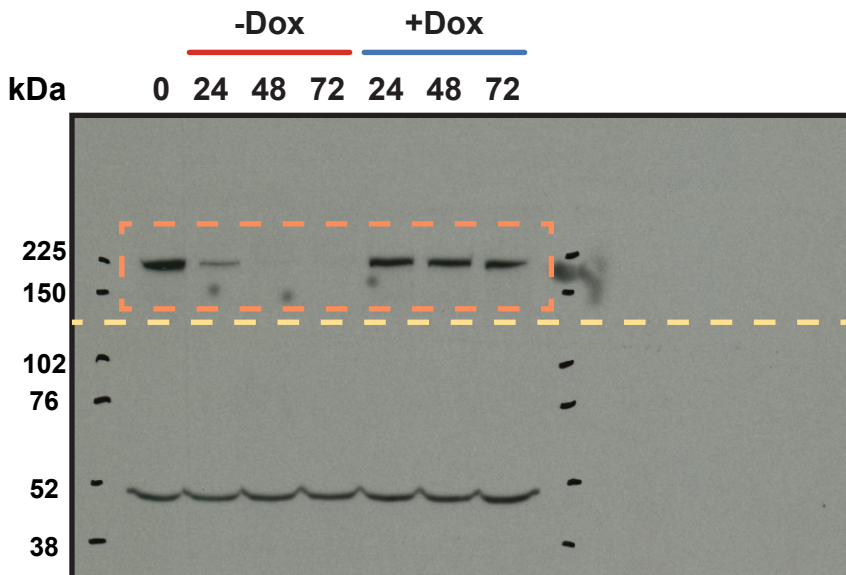

Hours

Anti-HA High Affinity Antibody (Roche 11867423001)

Approximate location membrane was cut.

Enolase I (CST 3810S)

**Fig. 1f:**

**Total p53 Gel**

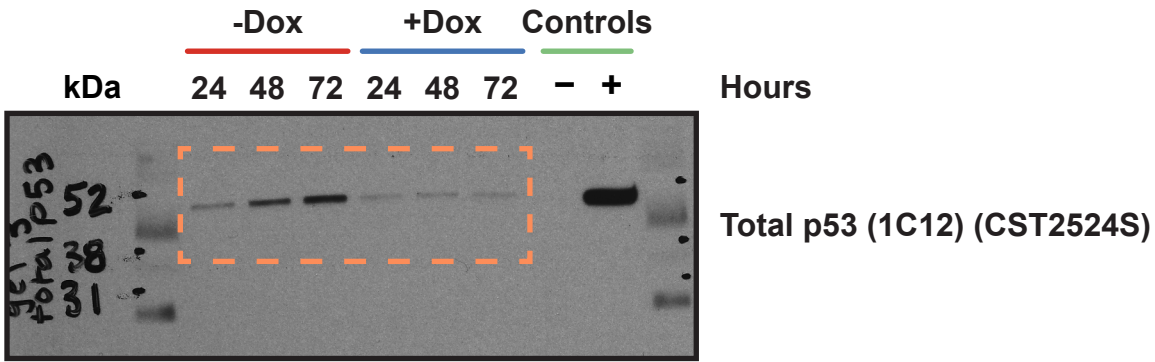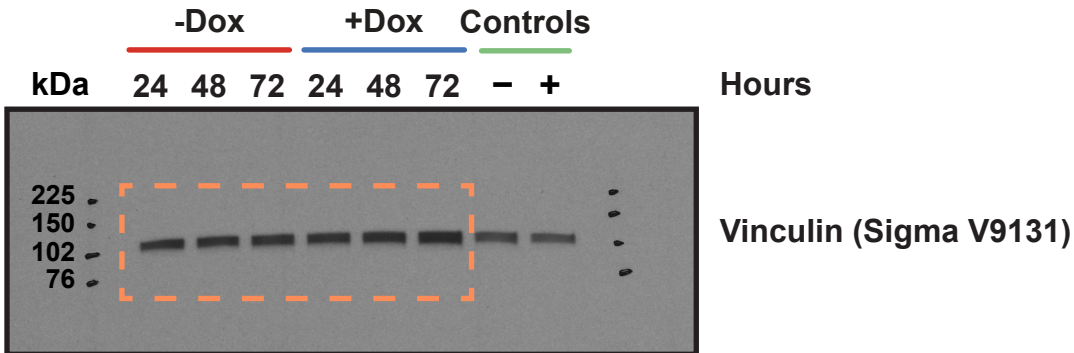

**pSer15-p53 Gel**

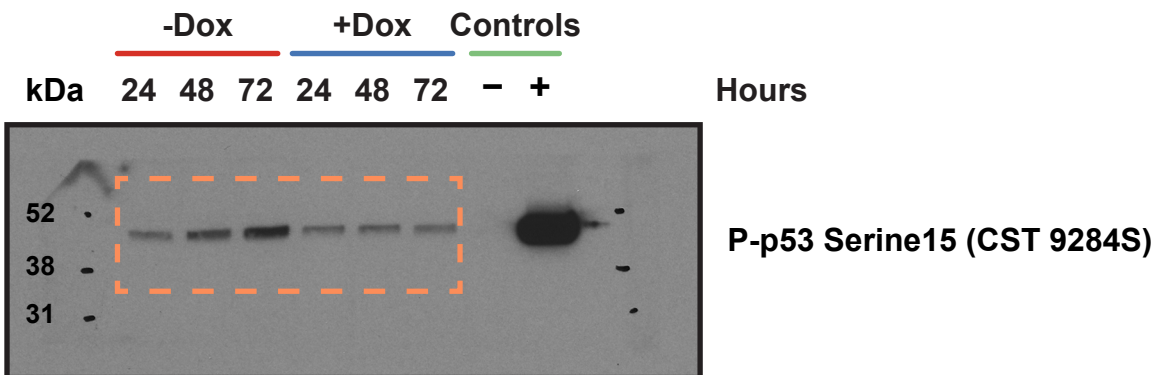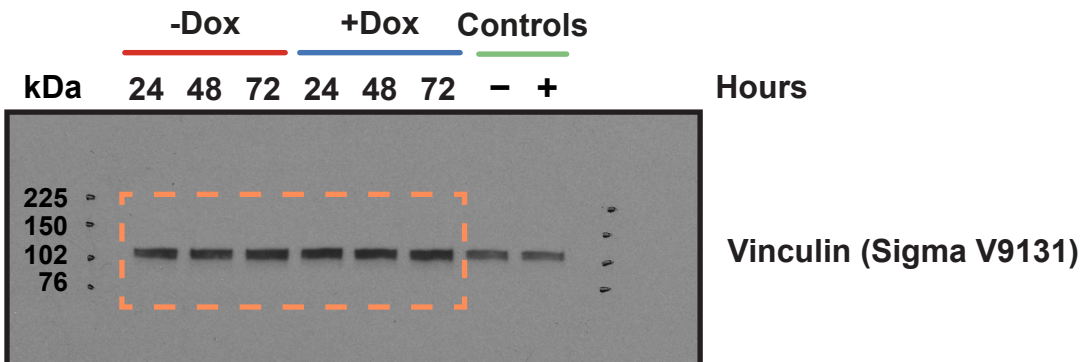

**Figure 1e Uncropped Blots Control Lanes:**

- +Lane (Positive Control)= wild type mESCs treated with 1uM Doxorubicin for 6hrs
- Lane (Negative Control)= wild type mESCs treated with DMSO (vehicle control) for 6hrs



**Fig. 4d:**

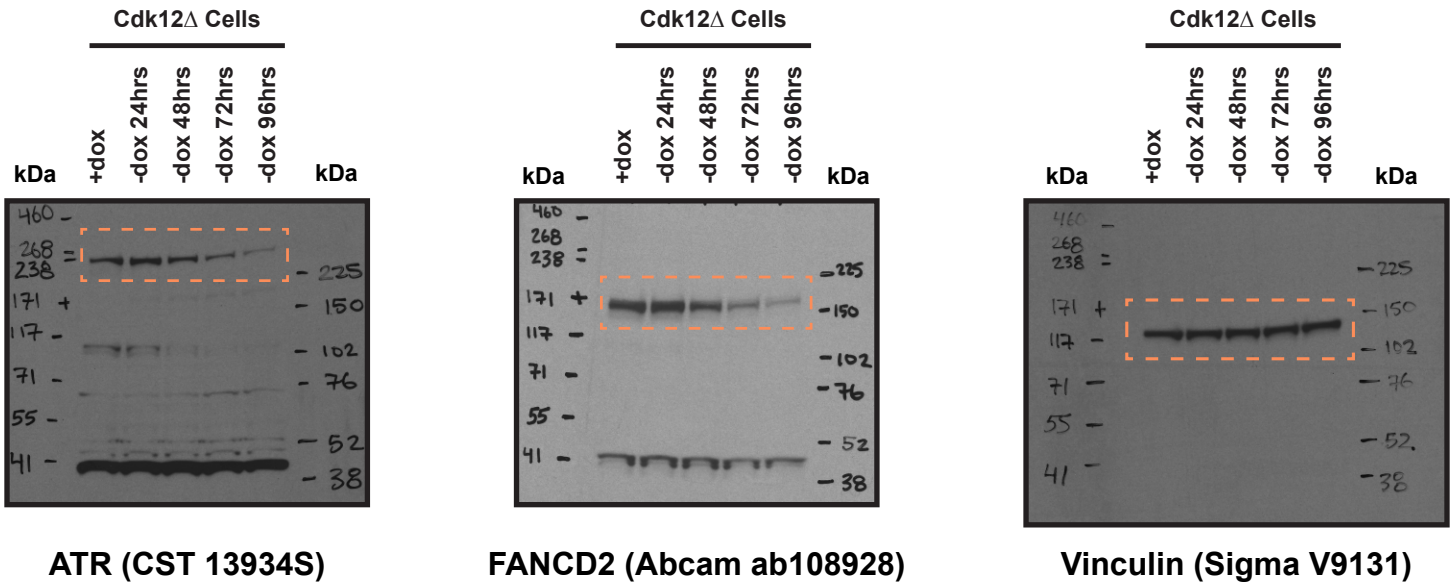

**Fig. 4e:**

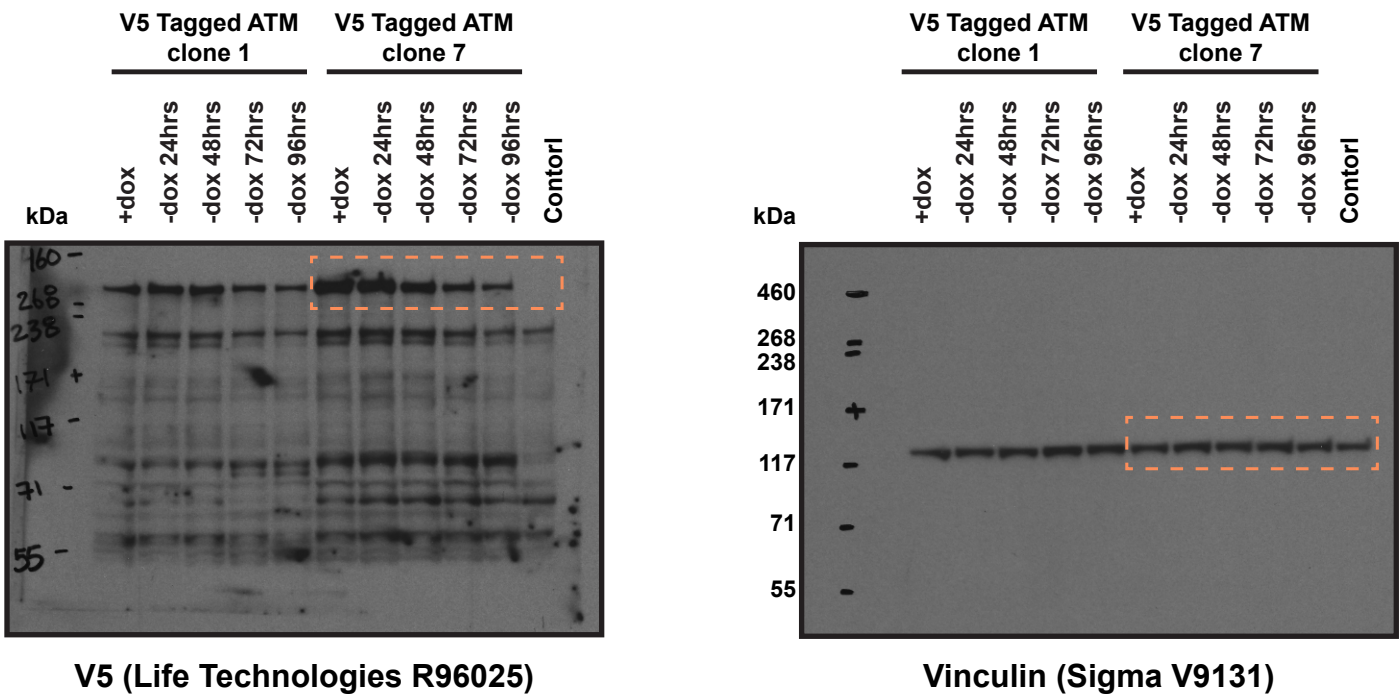

**Notes:**

- (1) Control lane = lysate from untagged, Cdk12Δ cells (+Dox) shown as an antibody specificity control.
- (2) Second, independently-derived endogenous V5-tagged ATM clone also shown.

**Fig. 4e (cont.):**

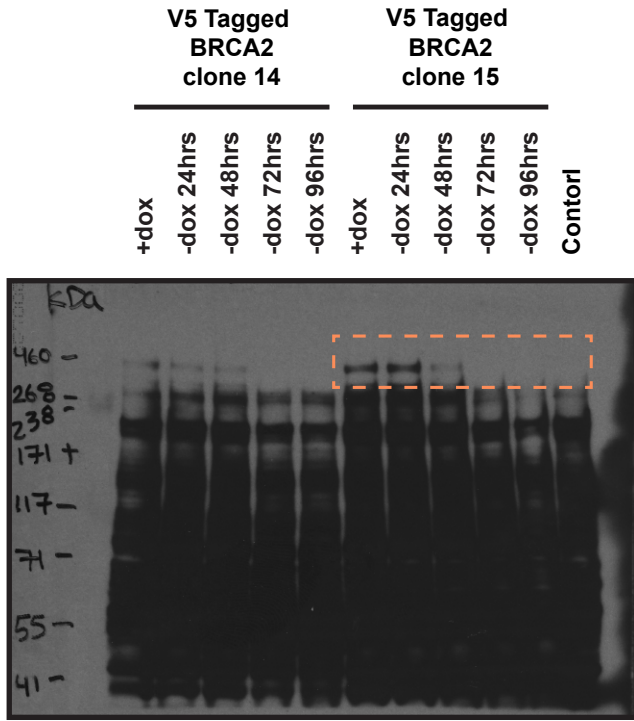

**V5 (Life Technologies R96025)**

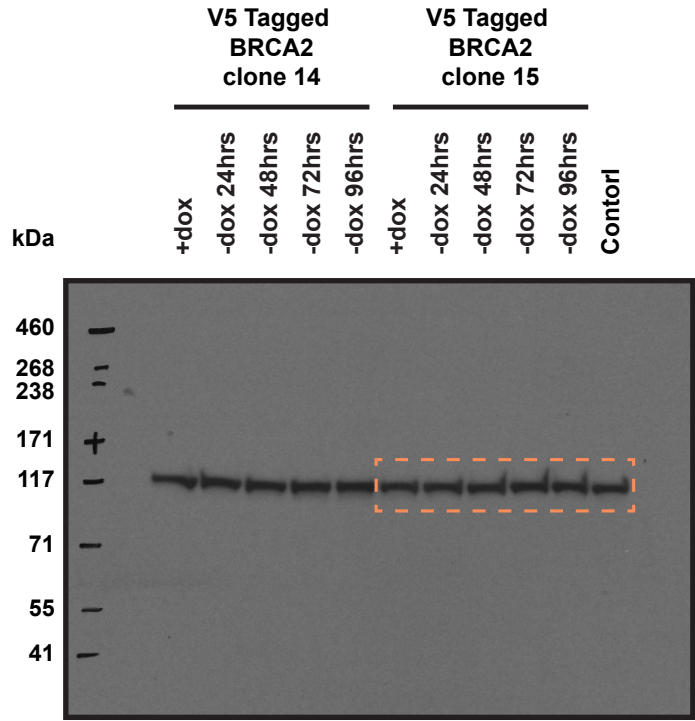

**Vinculin (Sigma V9131)**

**Notes:**

- (1) Control lane = lysate from untagged, Cdk12Δ cells (+Dox) shown as an antibody specificity control.
- (2) Second, independently-derived endogenous V5-tagged BRCA2 clone also shown.

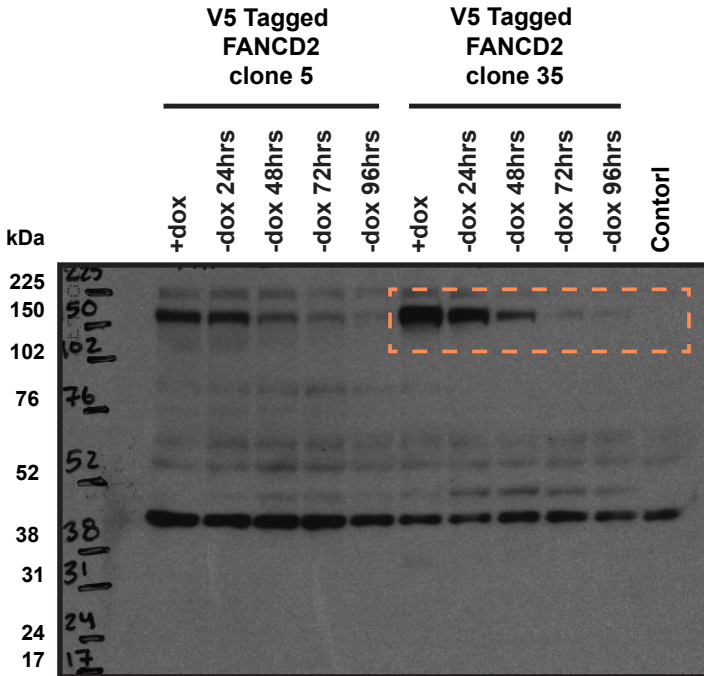

**V5 (Life Technologies R96025)**

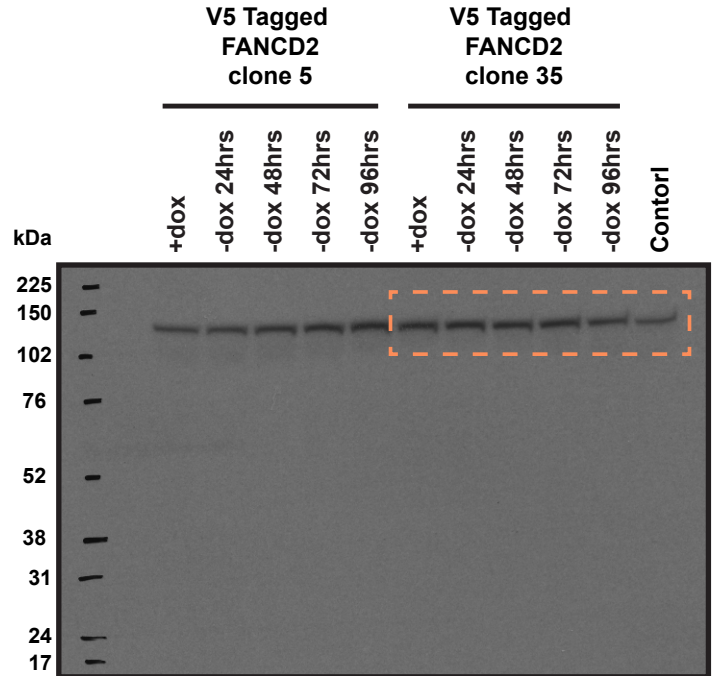

**Vinculin (Sigma V9131)**

**Notes:**

- (1) Control lane = lysate from untagged, Cdk12Δ cells (+Dox) shown as an antibody specificity control.
- (2) Second, independently-derived endogenous V5-tagged FANCD2 clone also shown.

# Extended Data Fig. 1c:

## Exposure used for Enolase

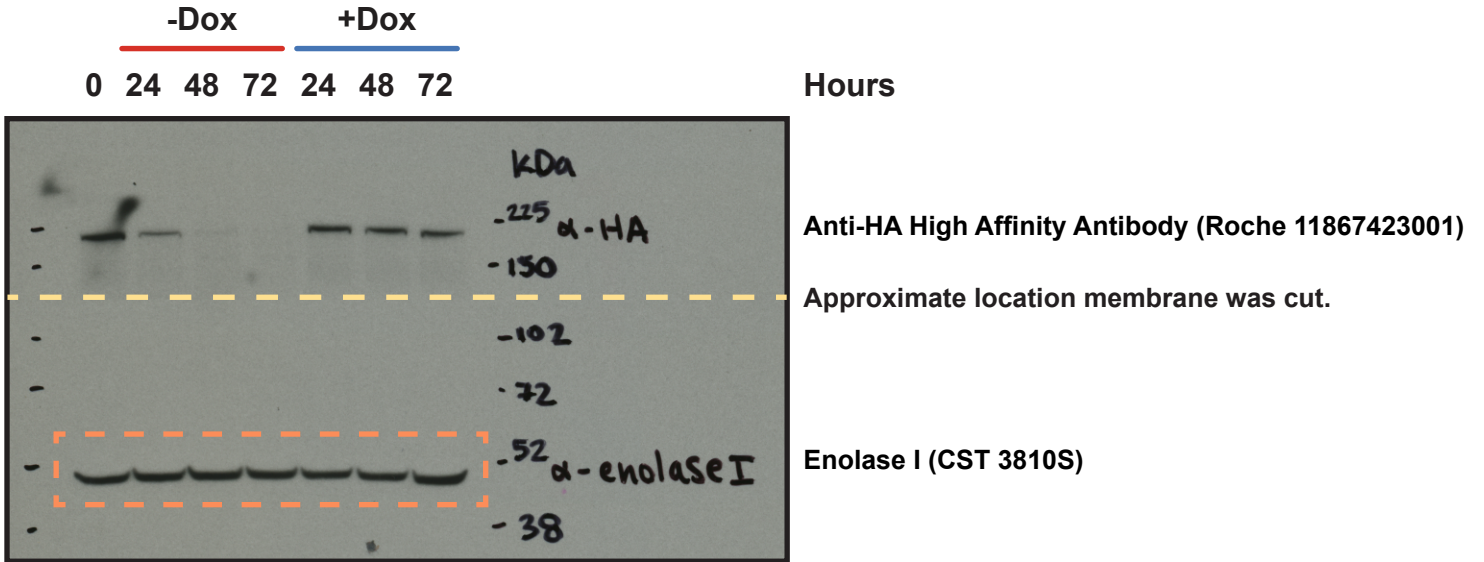

## Exposure used for HA-Cdk12

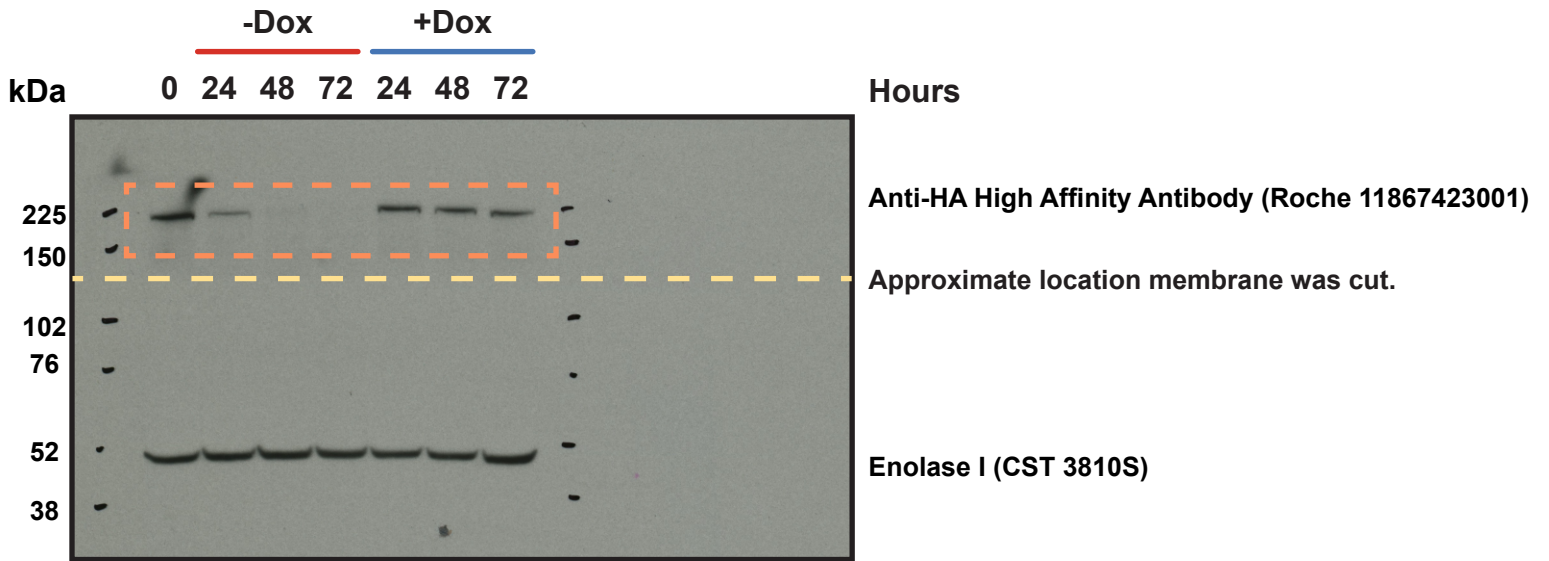

## Extended Data Fig. 1h:

### Total p53 Gel

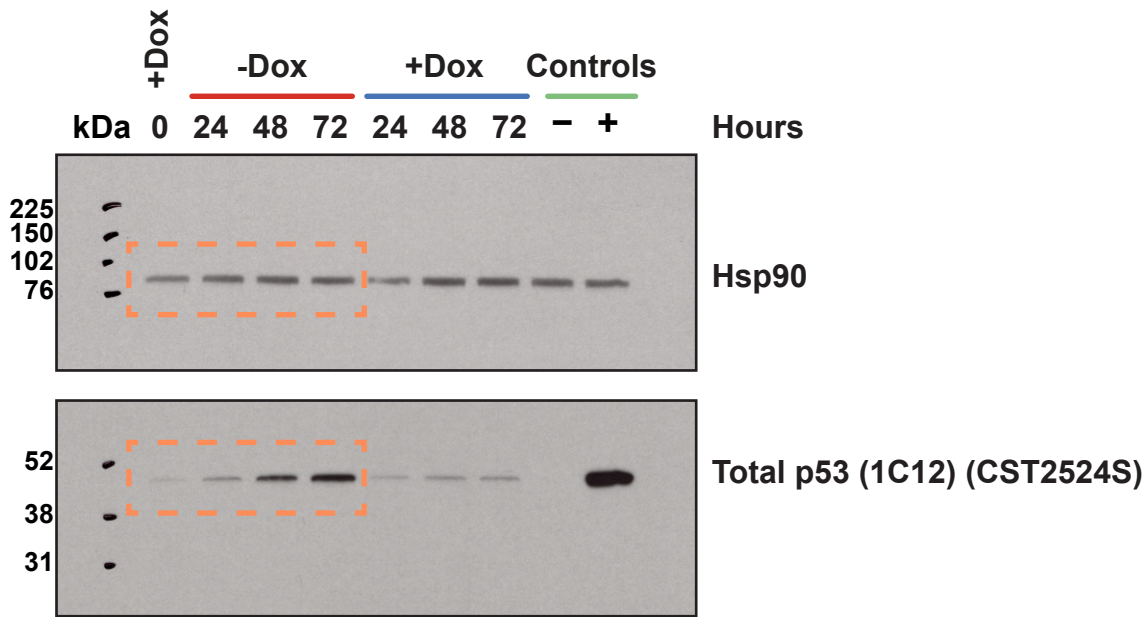

### pSer15-p53 Gel

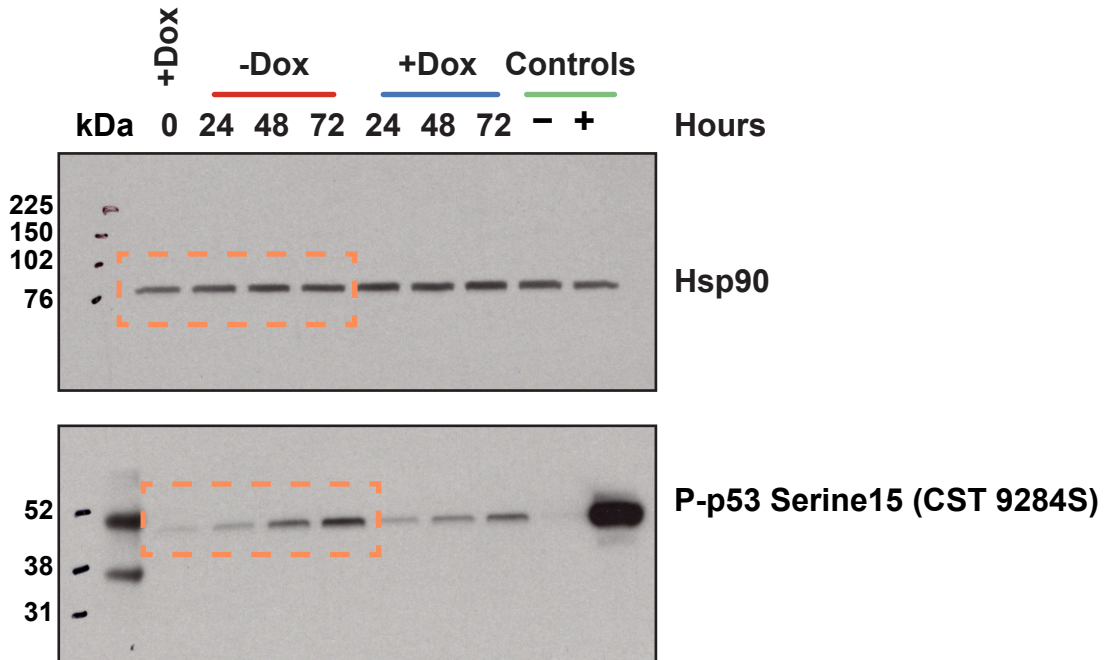

### Extended Data Fig. 1h Uncropped Blots Control Lanes:

+Lane (Positive Control)= wild type mESCs treated with 1uM Doxorubicin for 6hrs

-Lane (Negative Control)= wild type mESCs treated with DMSO (vehicle control) for 6hrs



# Extended Data Fig. 10c:

## 22RV1

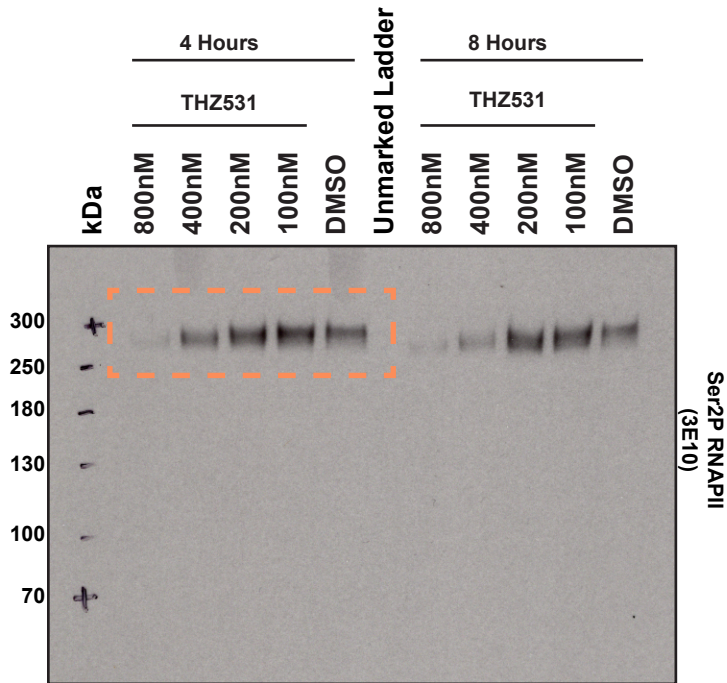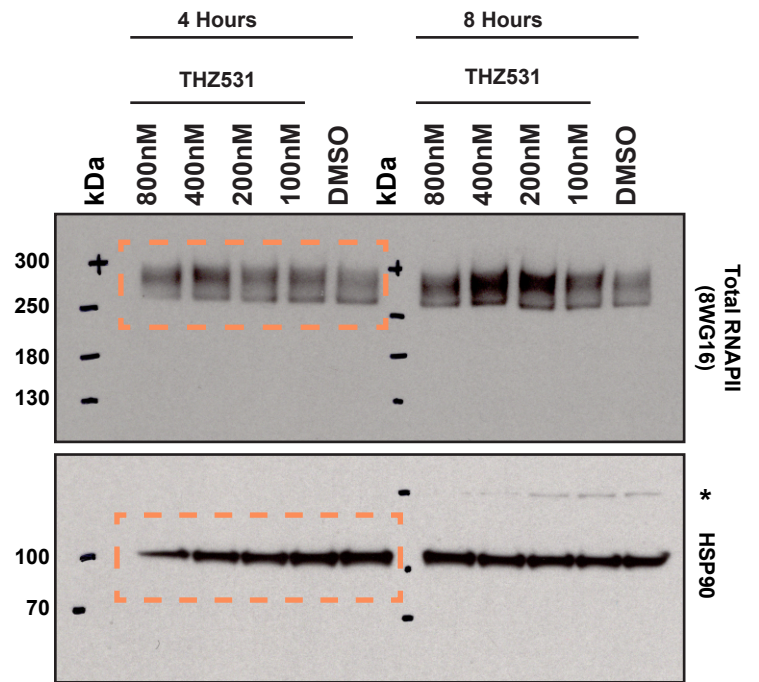

## PC-3

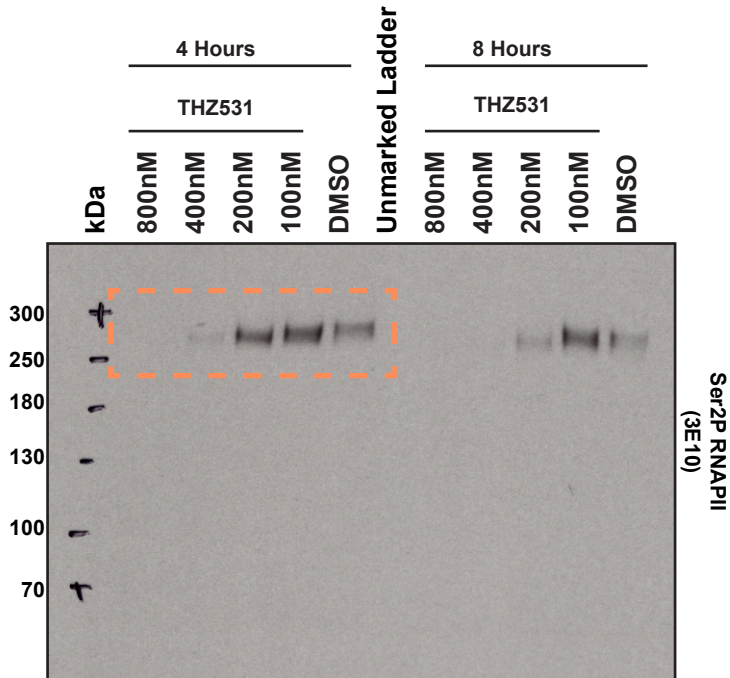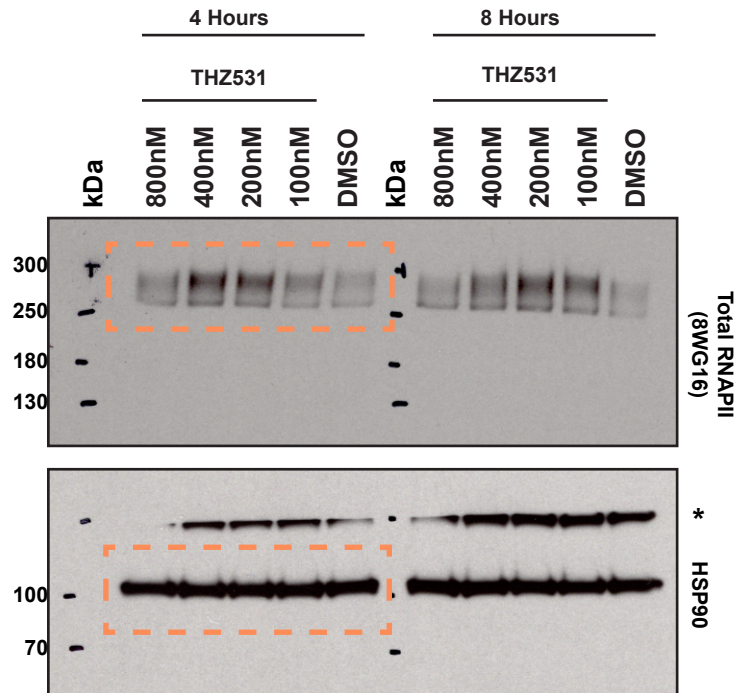

### Note:

\* indicates a band from a separate, prior antibody staining that did not strip off completely.

Extended Data Fig. 10c (cont.):

OVCAR4

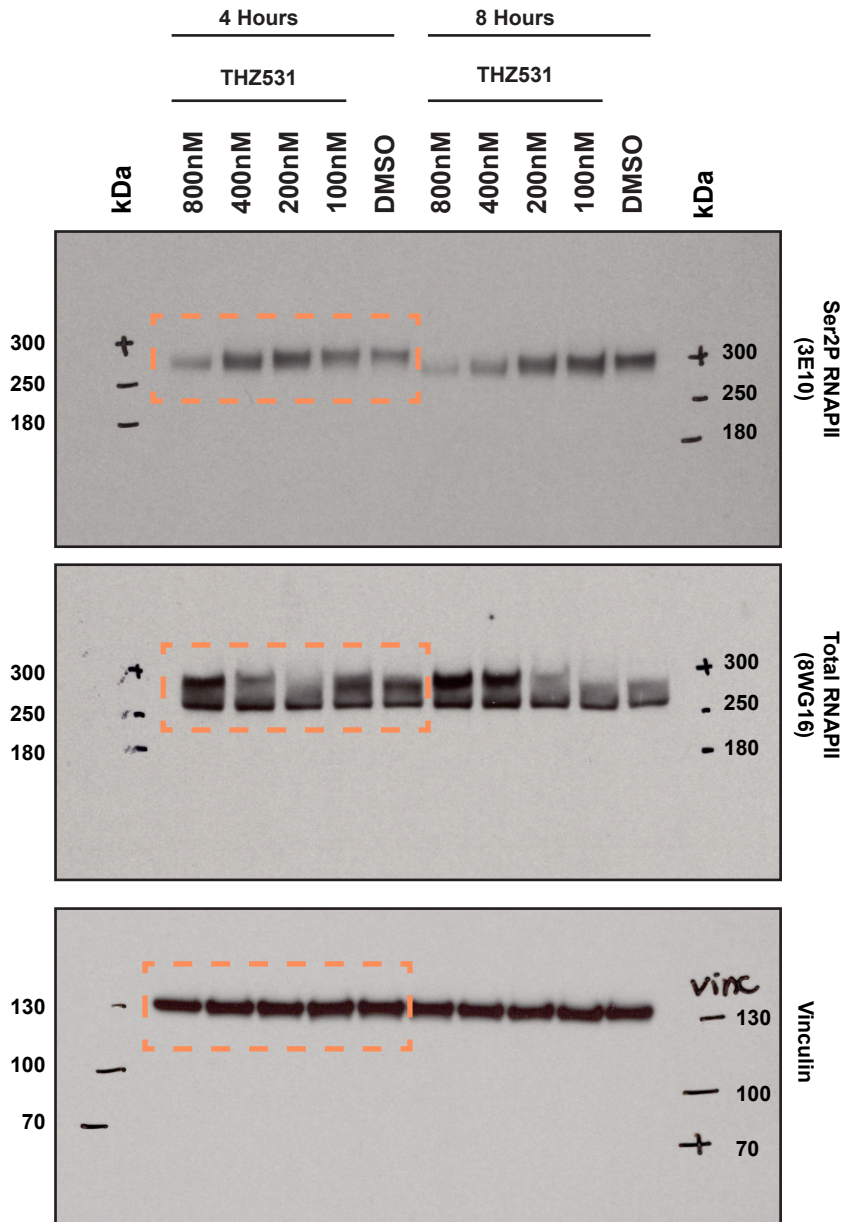

Supplement: NIHMS1509550-supplement-Supplementary_Figures.pdf [file NIHMS1509550-supplement-Supplementary_Figures.pdf]
